# Supplementary material for: Protective Effect of Hesperidin on the Oxidative Stress Induced by an Exhausting Exercise in Intensively Trained Rats
Source: PubMed Central journal article supplement (PMC6520900; doi:10.3390/nu11040783), 2019-04-04

## Supplementary material

**Figure S1.** Maximum distance run in the exhaustion tests throughout the study. M=Monday, F=Friday, wk=week. The non-supplemented group is represented by white symbols, and the hesperidin group by black symbols. Data are expressed as mean  $\pm$  SEM (n=22-23). Statistical difference: \*p < 0.05 between non-supplemented and the hesperidin-supplemented groups (Student's t-test).

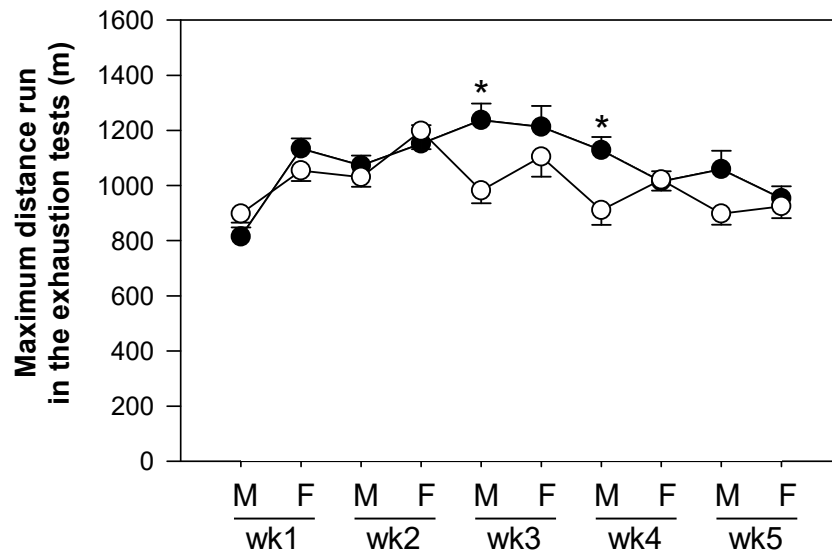

Supplement: nutrients-11-00783-s001.pdf [file nutrients-11-00783-s001.pdf]
